# Supplementary material for: Controllable synthesis of nickel sulfide nanocatalysts and their phase-dependent performance for overall water splitting
Source: Royal Society of Chemistry journal article supplement (doi:10.1039/c8nr09902b), 2019-01-01
Supplement: c8nr09902b1.pdf [file c8nr09902b1.pdf]

## **Supporting Information**

### **Controllable Synthesis of Nickel Sulfide Nanocatalysts and their Phase-Dependent Performance for Overall Water Splitting**

Xuerong Zheng, Xiaopeng Han,\* Yiqi Zhang, Jihui Wang, Cheng Zhong, Yida Deng\* and Wenbin Hu

School of Materials Science and Engineering, Tianjin Key Laboratory of Composite  
and Functional Materials, Key Laboratory of Advanced Ceramics and Machining  
Technology (Ministry of Education), Tianjin University, Tianjin 300072, China.

E-mail: xphan@tju.edu.cn (X. Han); yida.deng@tju.edu.cn (Y. Deng)

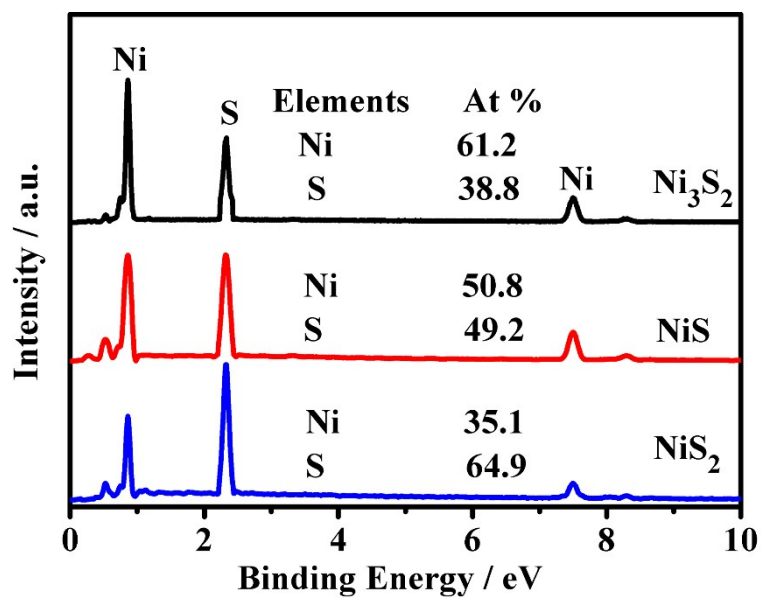

Figure S1 EDX spectra of Ni<sub>3</sub>S<sub>2</sub>, NiS and NiS<sub>2</sub> nanocrystals.

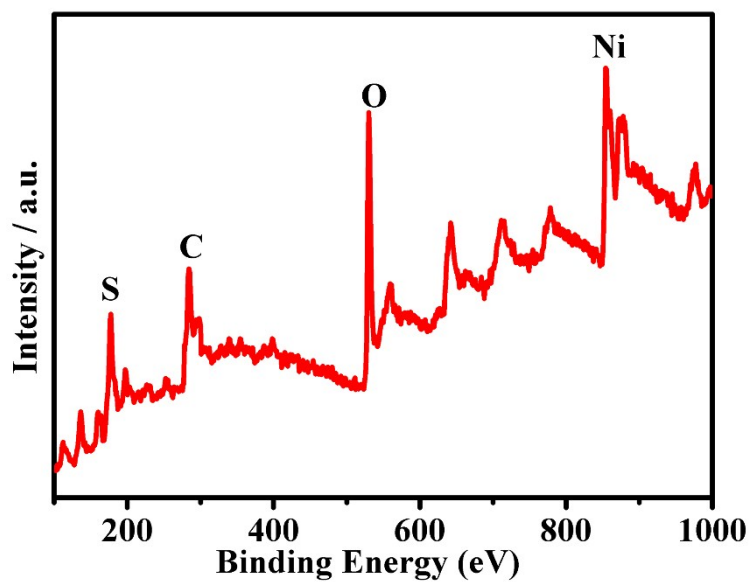

Figure S2 XPS survey spectrum of Ni<sub>3</sub>S<sub>2</sub> nanocrystals.

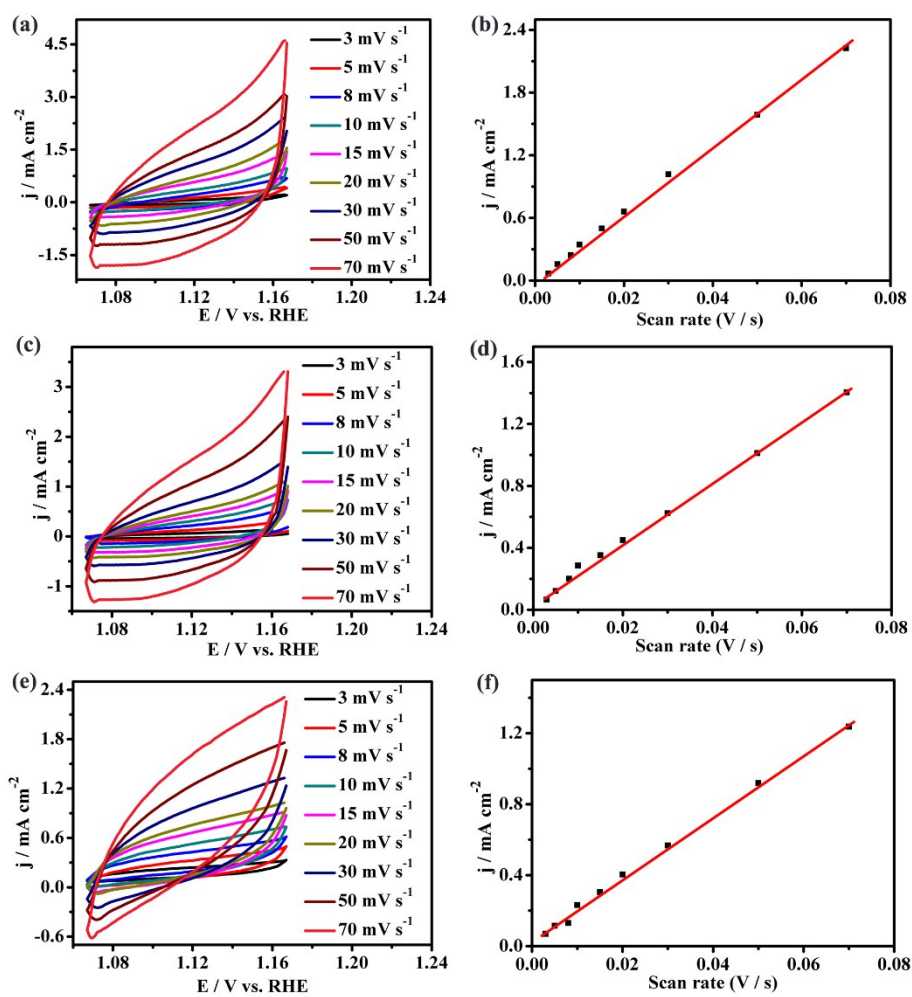

Figure S3 Cycle voltammograms from 1.067 to 1.167 V vs RHE in 0.1 M KOH at different scan rates of (a-b)  $\text{Ni}_3\text{S}_2$ , (c-d) NiS and (e-f)  $\text{NiS}_2$  electrodes.

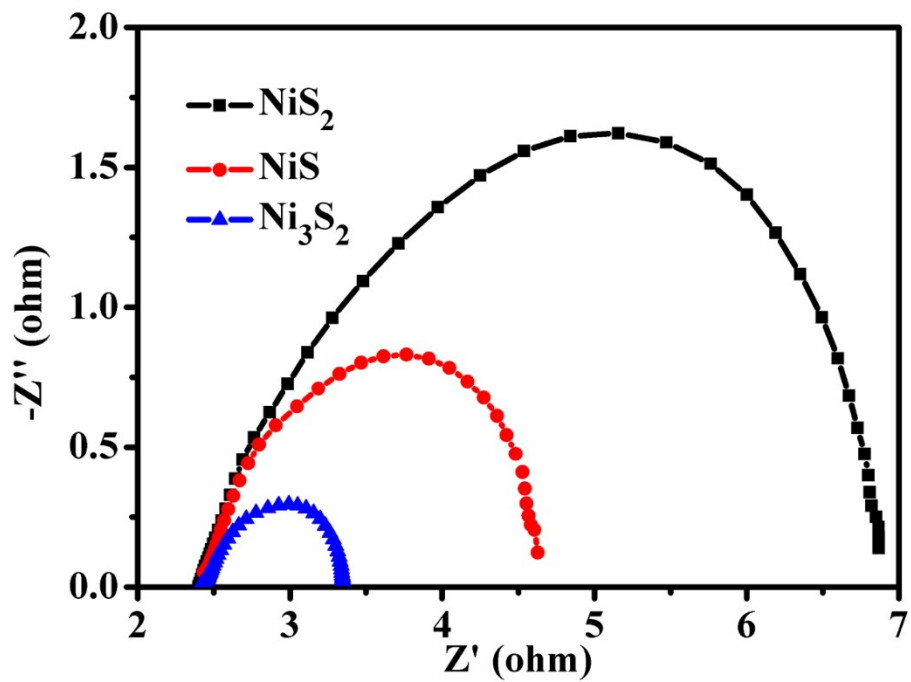

Figure S4 EIS Nyquist plots for  $\text{Ni}_3\text{S}_2$ ,  $\text{NiS}$  and  $\text{NiS}_2$  electrocatalysts.

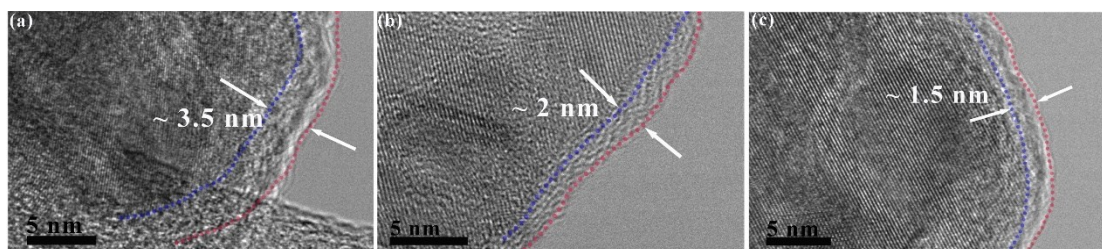

Figure S5 HRTEM images of (a)  $\text{Ni}_3\text{S}_2$ , (b)  $\text{NiS}$ , and (c)  $\text{NiS}_2$  nanocrystals after 1000 CV cycles.

**Table S1** Comparison of HER performances of transition metal compounds electrocatalysts that previously reported in 1.0 M KOH.

| Catalysts                                         | Electrode    | Tafel<br>(mV dec <sup>-1</sup> ) | Overpotential<br>(mV) at 10 mA cm <sup>-2</sup> | Refs |
|---------------------------------------------------|--------------|----------------------------------|-------------------------------------------------|------|
| Ni <sub>3</sub> Se <sub>2</sub> film              | Cu foam      | 98                               | 100                                             | 1    |
| Co-NiSe <sub>2</sub>                              | Ti plate     | 63                               | 64                                              | 2    |
| CoNiSe <sub>2</sub>                               | Ni foam      | 40                               | 120                                             | 3    |
| $\alpha$ -NiOOH                                   | Ni foam      | 119                              | 240                                             | 4    |
| MoS <sub>2</sub> /Ni <sub>3</sub> S <sub>2</sub>  | Ni foam      | 88                               | 280                                             | 5    |
| NiSe/NF                                           | Ni foam      | 120                              | 150                                             | 6    |
| Ni <sub>2</sub> P/NiFe                            | Ni foam      | 67                               | 75                                              | 7    |
| NiFe-LDH                                          | Ni foam      | 70                               | 160                                             | 8    |
| Ni <sub>1-x</sub> Co <sub>x</sub> Se <sub>2</sub> | Ni foam      | 52                               | 140                                             | 9    |
| CoS <sub>2x</sub> Se <sub>2(1-x)</sub>            | Carbon paper | 44                               | 120                                             | 10   |
| Ni <sub>3</sub> S <sub>2</sub>                    | Carbon cloth | 67                               | 112                                             | TW*  |
| NiS                                               | Carbon cloth | 93                               | 160                                             | TW*  |
| NiS <sub>2</sub>                                  | Carbon cloth | 110                              | 227                                             | TW*  |

**Table S2** Comparison of OER performances of transition metal compounds electrocatalysts that previously reported in 1.0 M KOH.

| Catalysts                                        | Electrode    | Tafel<br>(mV dec <sup>-1</sup> ) | Overpotential<br>(mV) at 50 mA cm <sup>-2</sup> | Refs |
|--------------------------------------------------|--------------|----------------------------------|-------------------------------------------------|------|
| Ni <sub>3</sub> Se <sub>2</sub> film             | Cu foam      | 80                               | 310                                             | 1    |
| Co-NiSe <sub>2</sub>                             | Ti plate     | 94                               | 300                                             | 2    |
| CoNiSe <sub>2</sub>                              | Ni foam      | 79                               | 260                                             | 3    |
| $\alpha$ -NiOOH                                  | Ni foam      | 76                               | 350                                             | 4    |
| MoS <sub>2</sub> /Ni <sub>3</sub> S <sub>2</sub> | Ni foam      | 83                               | 110                                             | 5    |
| NiSe/NF                                          | Ni foam      | 75                               | 300                                             | 6    |
| Ni <sub>2</sub> P/NiFe                           | Ni foam      | 32                               | 210                                             | 7    |
| NiFe LDH/NF                                      | Ni foam      | 86                               | 280                                             | 8    |
| Ni-CoSe <sub>2</sub>                             | FTO          | 78                               | 380                                             | 11   |
| NiSe <sub>2</sub>                                | Carbon cloth | 84                               | 310                                             | 12   |
| Ni <sub>3</sub> S <sub>2</sub>                   | Carbon cloth | 52                               | 330                                             | TW*  |
| NiS                                              | Carbon cloth | 92                               | 410                                             | TW*  |
| NiS <sub>2</sub>                                 | Carbon cloth | 138                              | 490                                             | TW*  |

**Table S3.** Hall measurement data of NiS<sub>x</sub> electrocatalysts.

| Catalyst                       | Resistivity / $\Omega$ cm | Carrier<br>concentration / cm <sup>3</sup> |
|--------------------------------|---------------------------|--------------------------------------------|
| Ni <sub>3</sub> S <sub>2</sub> | 0.852                     | $2.360 \times 10^{19}$                     |
| NiS                            | 4.783                     | $6.937 \times 10^{18}$                     |
| NiS <sub>2</sub>               | 7.561                     | $3.752 \times 10^{18}$                     |

**Table S4** Overall watersplitting performances of transition metal compounds electrocatalysts that previously reported in 1.0 M KOH.

| Catalysts                                        | Electrode    | Current density (mA cm <sup>-2</sup> ) | Potential (V) | Refs |
|--------------------------------------------------|--------------|----------------------------------------|---------------|------|
| Ni <sub>3</sub> Se <sub>2</sub> film             | Cu foam      | 10                                     | 1.65          | 1    |
| Co-NiSe <sub>2</sub>                             | Ti plate     | 10                                     | 1.62          | 2    |
| CoNiSe <sub>2</sub>                              | Ni foam      | 10                                     | 1.59          | 3    |
| α-NiOOH                                          | Ni foam      | 10                                     | 1.66          | 4    |
| MoS <sub>2</sub> /Ni <sub>3</sub> S <sub>2</sub> | Ni foam      | 10                                     | 1.56          | 5    |
| NiSe/NF                                          | Ni foam      | 10                                     | 1.63          | 6    |
| Ni <sub>2</sub> P/NiFe                           | Ni foam      | 10                                     | 1.51          | 7    |
| NiFe-LDSH                                        | Ni foam      | 10                                     | 1.53          | 8    |
| Co <sub>2</sub> P                                | Ni foam      | 10                                     | 1.57          | 13   |
| Co-NiSe <sub>2</sub> /C                          | Ni foam      | 10                                     | 1.61          | 14   |
| Ni <sub>3</sub> S <sub>2</sub>                   | Carbon cloth | 10                                     | 1.63          | TW*  |
| NiS                                              | Carbon cloth | 10                                     | 1.74          | TW*  |
| NiS <sub>2</sub>                                 | Carbon cloth | 10                                     | 1.85          | TW*  |

### Supplementary References

- [1] J. L. Shi, J. M. Hu, Y. L. Luo, X. P. Sun, A. M. Asiric, *Catal. Sci. Technol.*, 2015, **5**, 4954.
- [2] T. T. Liu, A. M. Asirib, X. P. Sun, *Nanoscale*, 2016, **8**, 3911.
- [3] T. Chen, Y. W. Tan, *Nano Research*, 2018, **11**, 1331.

- [4] Q. Zhang, C. Zhang, J. B. Liang, P. G. Yin, Y. Tian, *ACS Sustainable Chem. Eng.*, 2017, **5**, 3808.
- [5] J. Zhang, T. Wang, D. Pohl, B. Rellinghaus, R. H. Dong, S. H. Liu, X. D. Zhuang, X. L. Feng, *Angew. Chem. Int. Ed.*, 2016, **55**, 6702.
- [6] C. Tang, N. Y. Cheng, Z. H. Pu, W. Xing, X. P. Sun, *Angew. Chem. Int. Ed.*, 2015, **54**, 9351.
- [7] F. S. Zhang, J. W. Wang, J. Luo, R. R. Liu, Z. M. Zhang, C. T. He, T. B. Lu, *Chem. Sci.*, 2018, **9**, 1375.
- [8] S. Dutta, A. Indra, Y. Feng, T. Song, U. Paik, *ACS Appl. Mater. Interfaces*, **2017**, **9**, 33766.
- [9] T. Zhang, M. Y. Wu, D. Y. Yan, J. Mao, H. Liu, W. B. Hu, X. W. Du, T. Ling, S. Z. Qiao, *Nano Energy*, 2018, **43**, 103.
- [10] K. L. Liu, F. M. Wang, K. Xu, T. A. Shifa, Z. Z. Cheng, X. Y. Zhan, J. He, *Nanoscale*, 2016, **8**, 4699.
- [11] Y. W. Liu, X. M. Hua, C. Xiao, T. F. Zhou, P. C. Huang, Z. P. Guo, B. C. Pan, Y. Xie, *J. Am. Chem. Soc.*, 2016, **138**, 5087.
- [12] Z. Y. Wang, J. T. Li, X. C. Tian, X. P. Wang, Y. Yu, K. A. Owusu, L. He, L. Q. Mai, *ACS Appl. Mater. Interfaces*, 2016, **8**, 19386.
- [13] J. J. Duan, S. Chen, A. Vasile, S. Z. Qiao, *ACS Nano*, 2016, **10**, 8738.
- [14] F. W. Ming, H. F. Liang, H. H. Shi, X. Xu, G. Mei, Z. C. Wang, *J. Mater. Chem. A*, 2016, **4**, 15148.
